# Supplementary material for: SerpinE1 drives a cell-autonomous pathogenic signaling in Hutchinson–Gilford progeria syndrome
Source: PubMed Central journal article supplement (PMC9418244; doi:10.1038/s41419-022-05168-y), 2022-08-26

# Supplementary Figure 1

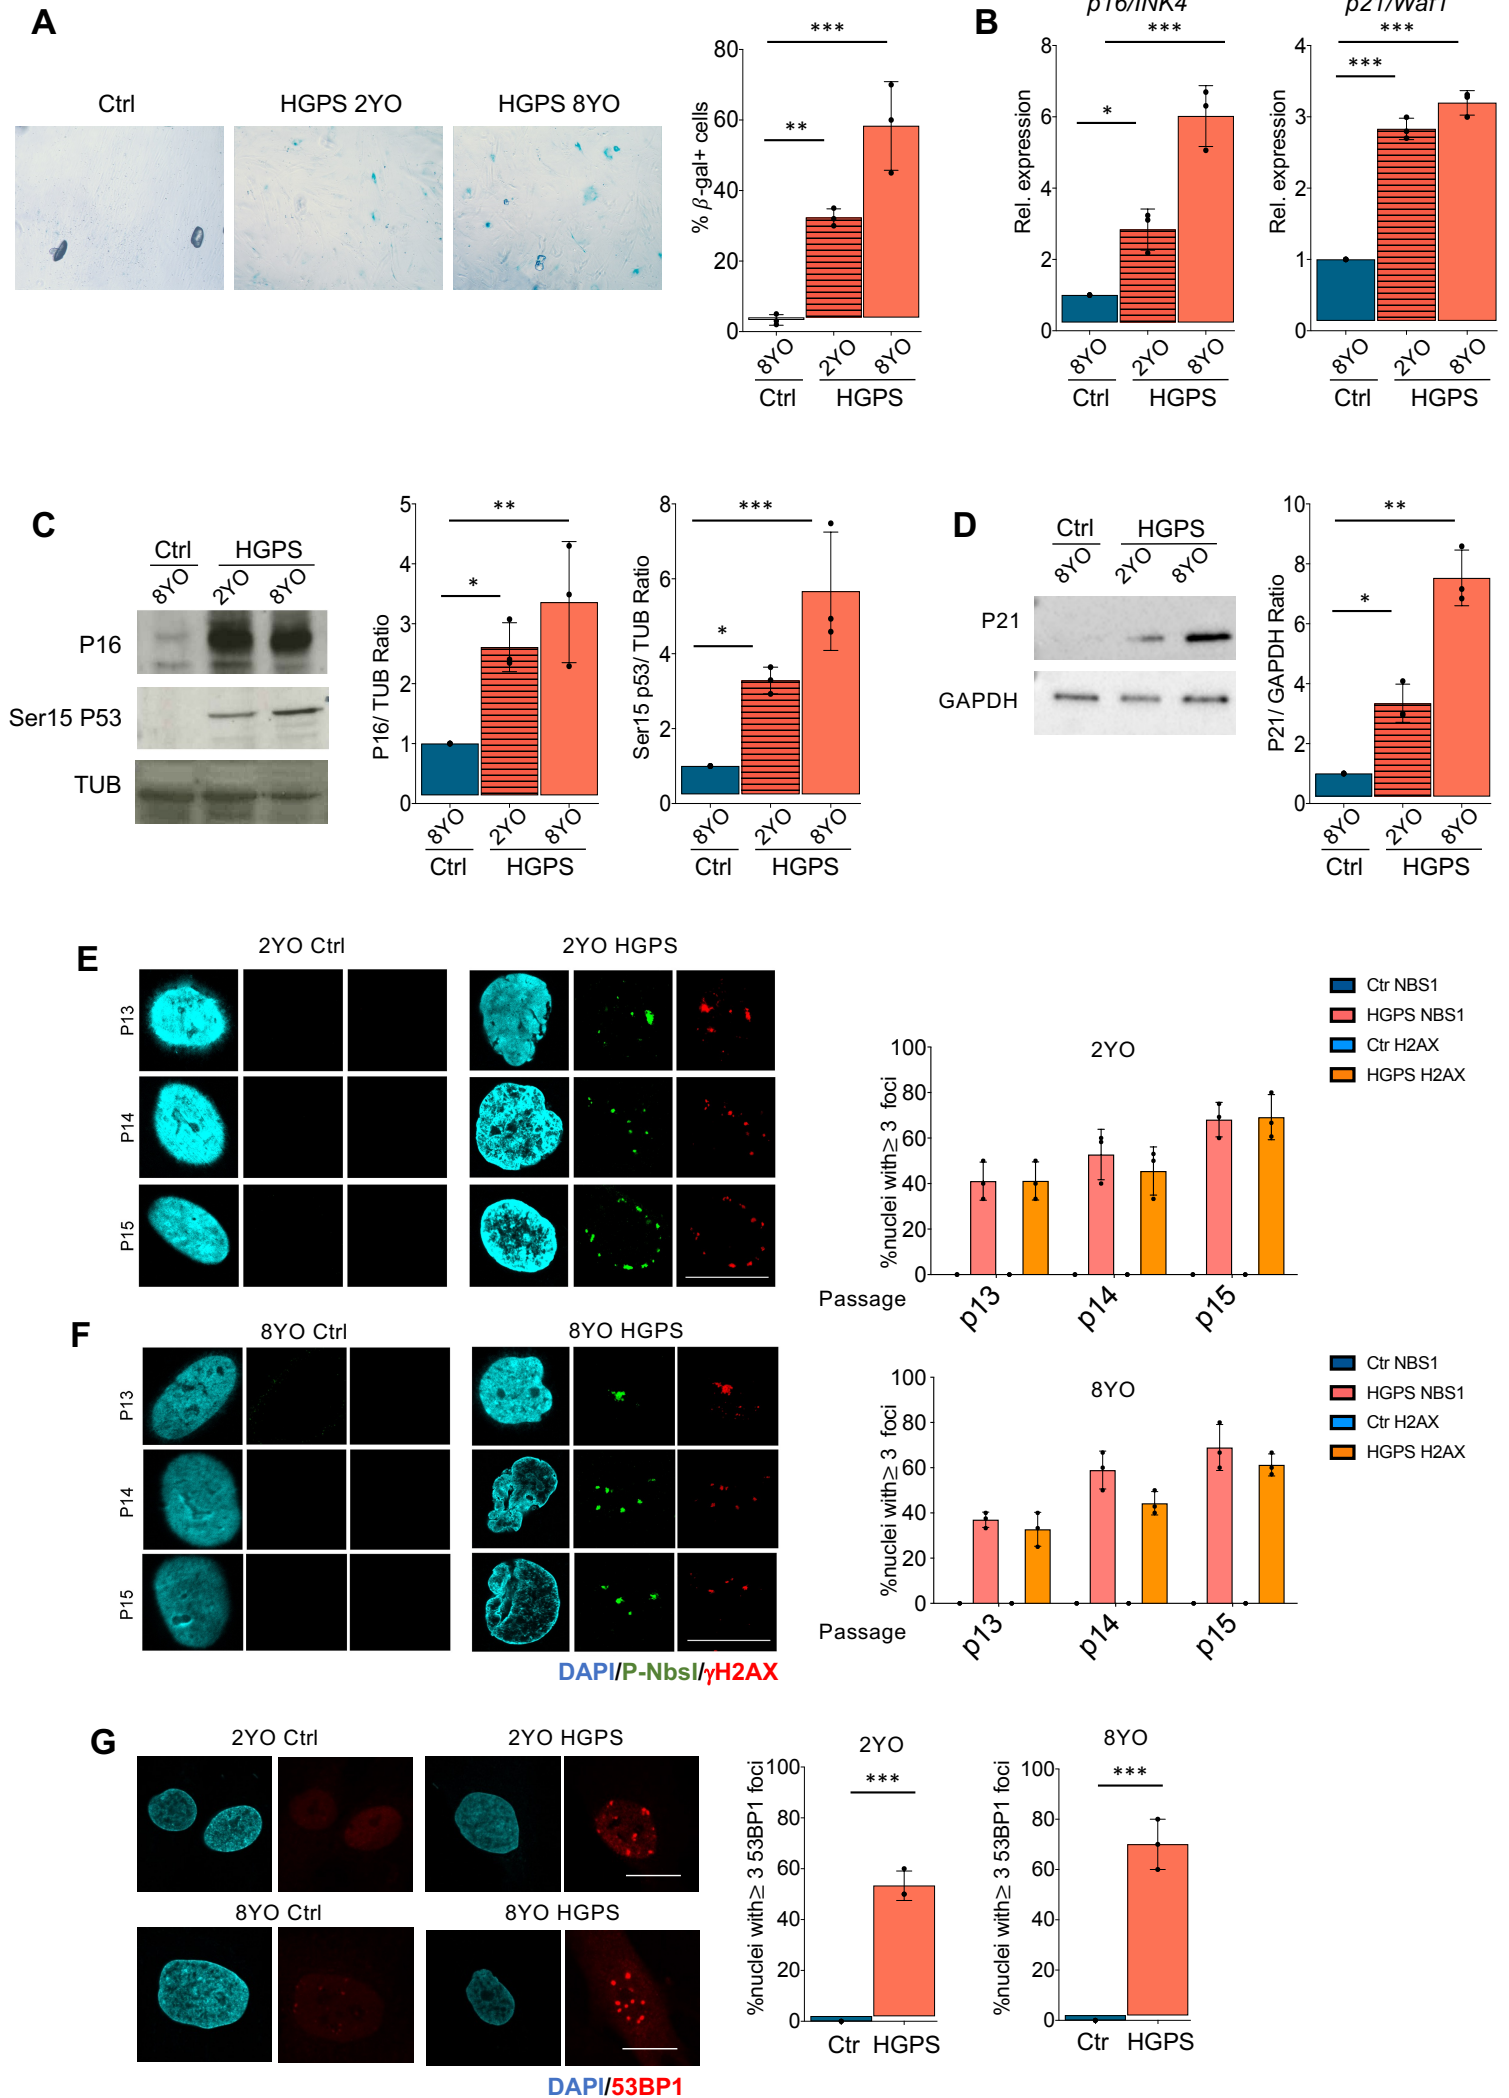

Supplement: 41419_2022_5168_MOESM2_ESM.pdf [file 41419_2022_5168_MOESM2_ESM.pdf]
