# Supplementary material for: SerpinE1 drives a cell-autonomous pathogenic signaling in Hutchinson–Gilford progeria syndrome
Source: PubMed Central journal article supplement (PMC9418244; doi:10.1038/s41419-022-05168-y), 2022-08-26
Supplement: 41419_2022_5168_MOESM6_ESM.pdf [file 41419_2022_5168_MOESM6_ESM.pdf]

Fig.1E

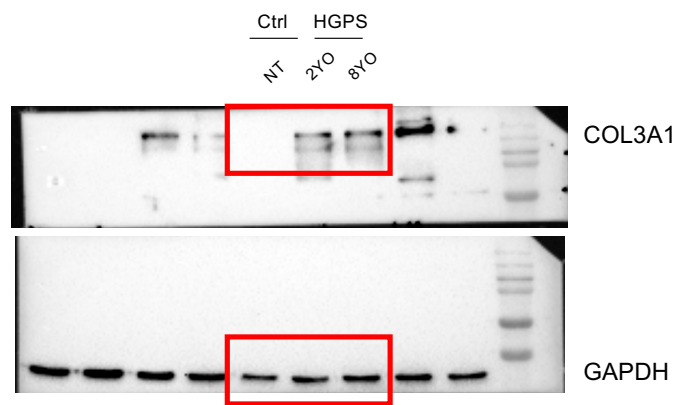

Fig.1F

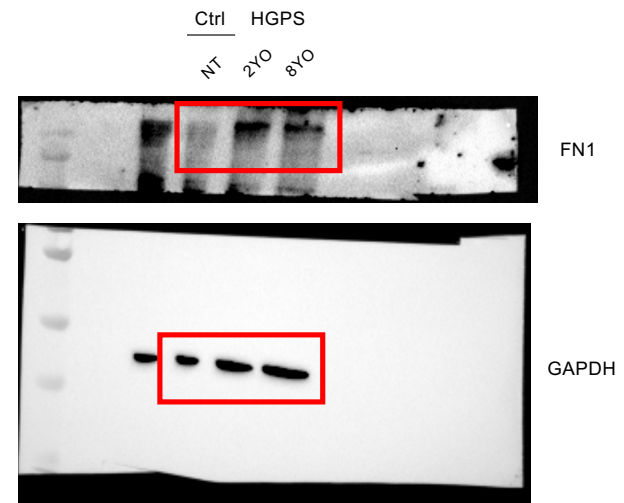

Fig.2C

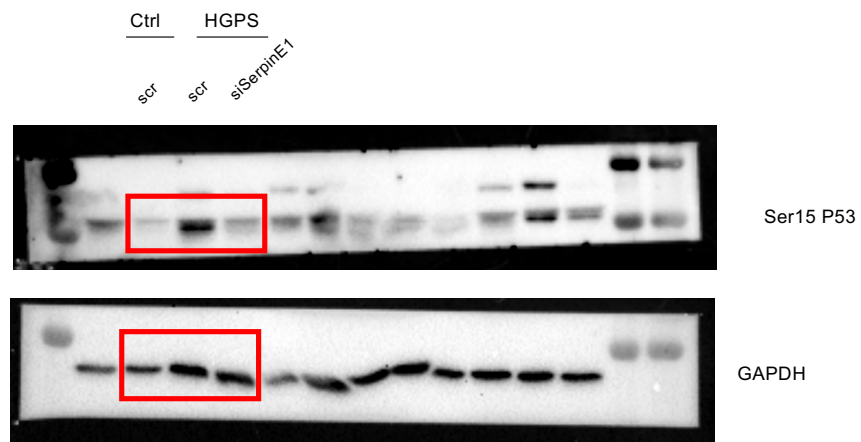

Fig.2G

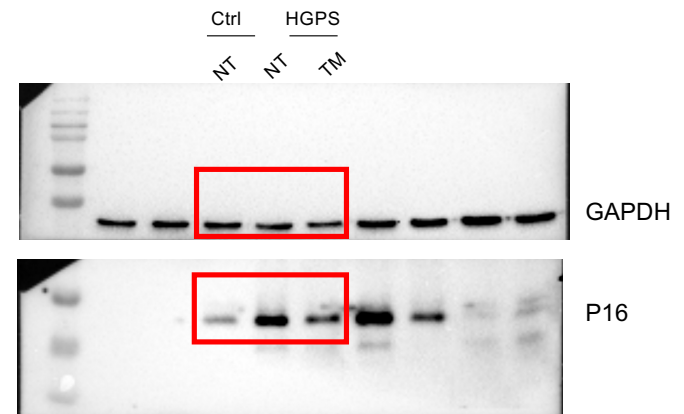

Fig.3A

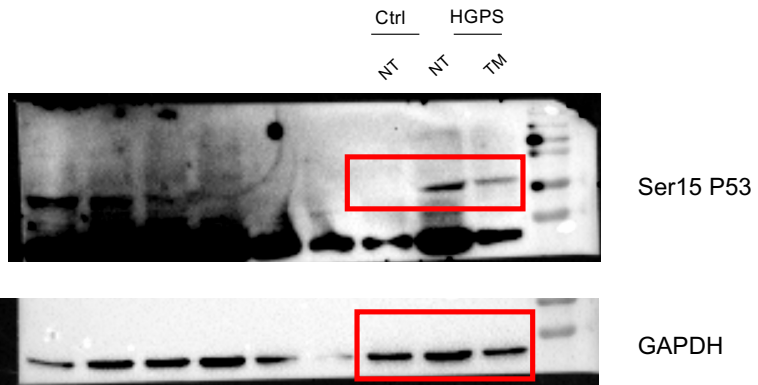

Fig.4E

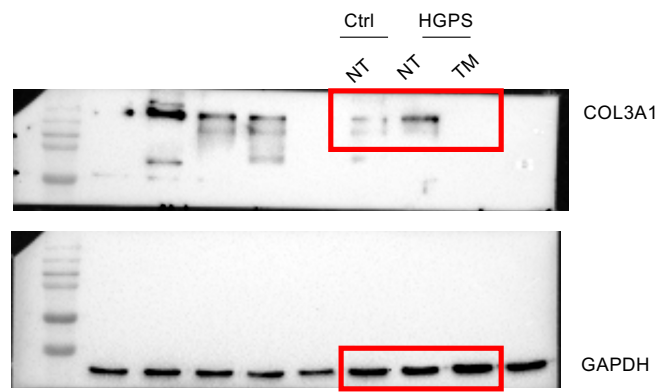

Fig.Supp1C

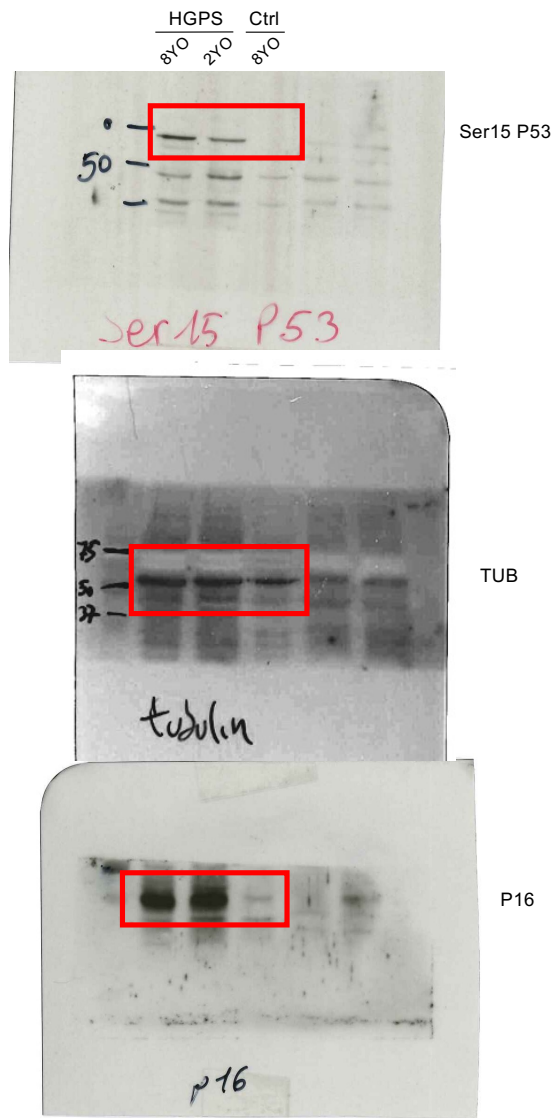

Fig.Supp1D

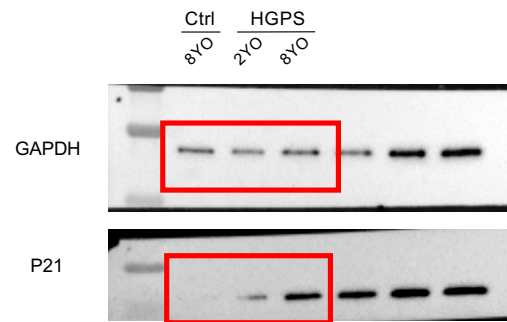

Supp Fig 2B

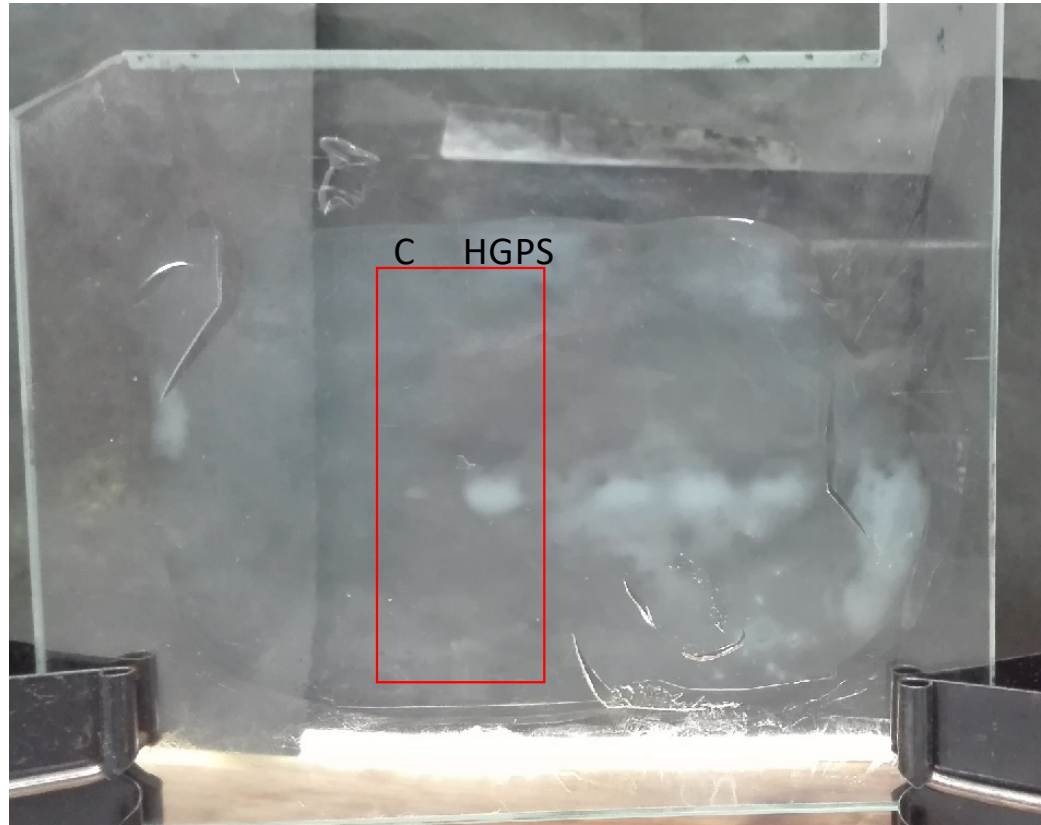

Supp Fig 2C

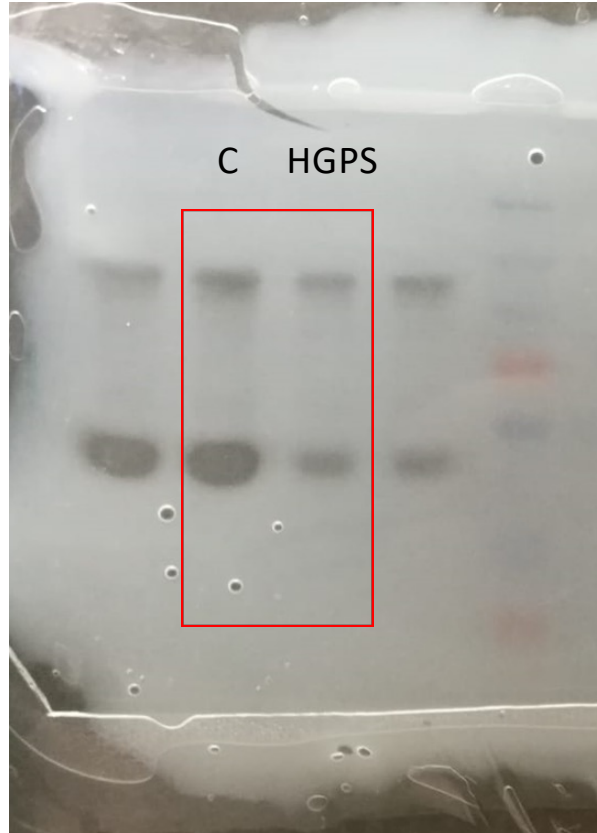

Supp Fig 2E

-Amiloride

+Amiloride

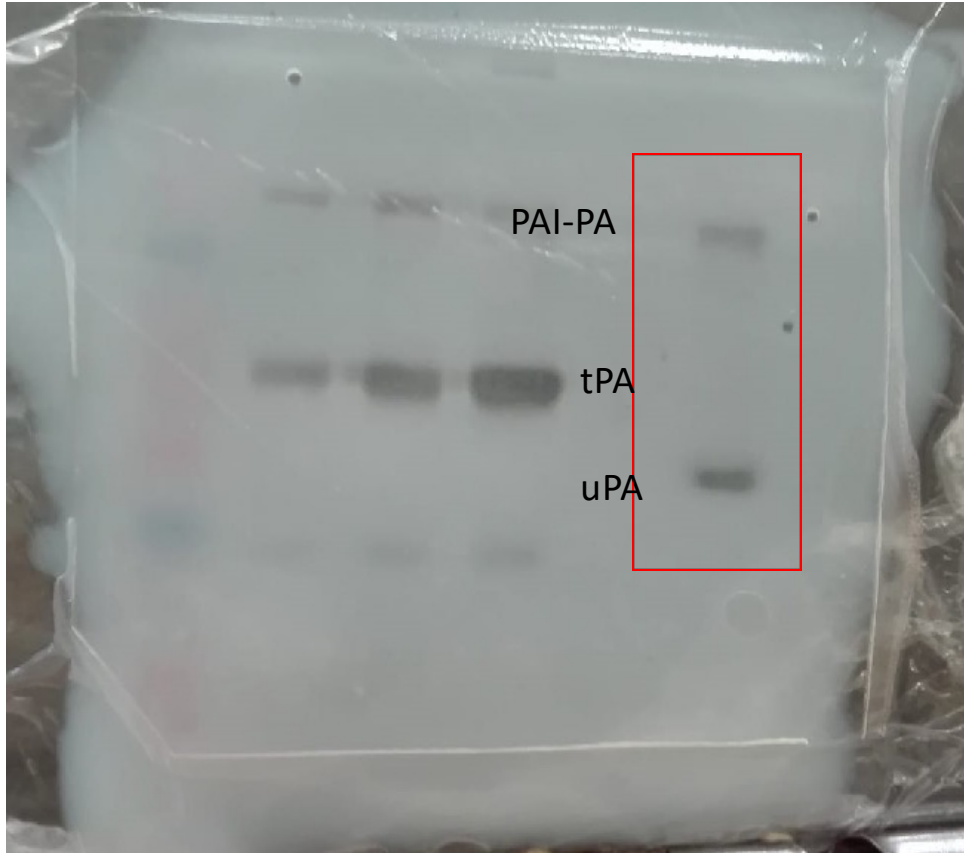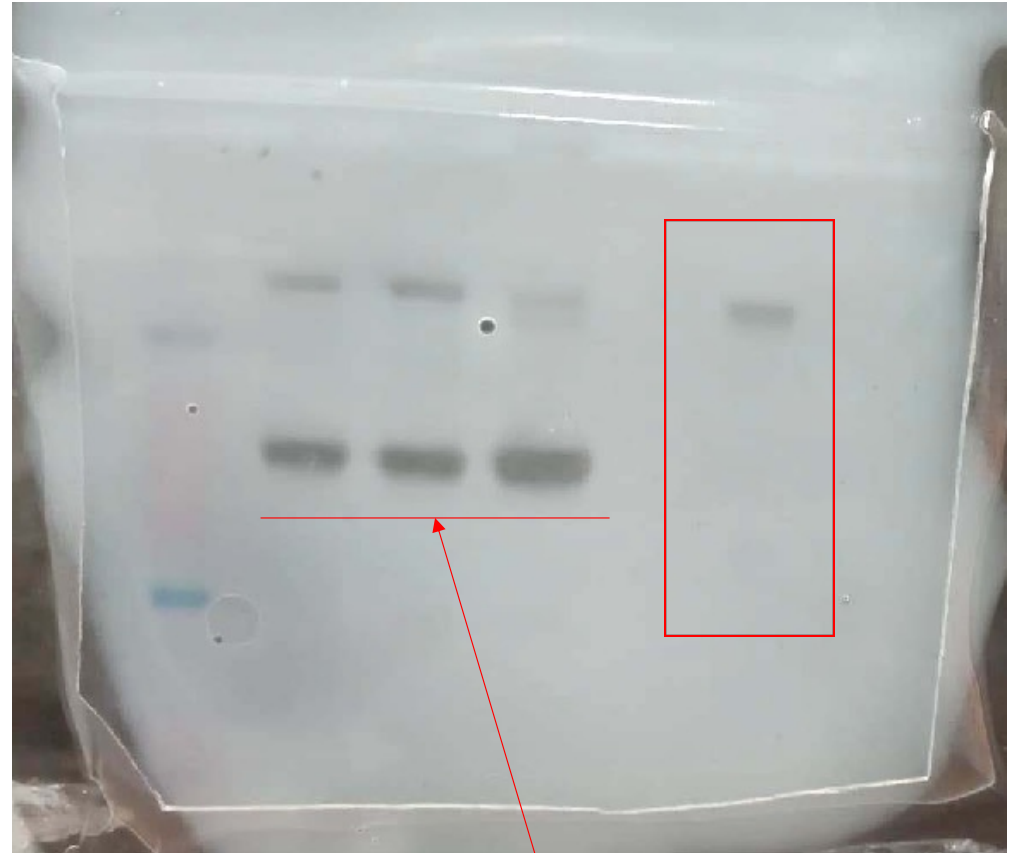

Controls for amiloride  
tPA is not affected by the presence of amiloride



Supp Fig 3A

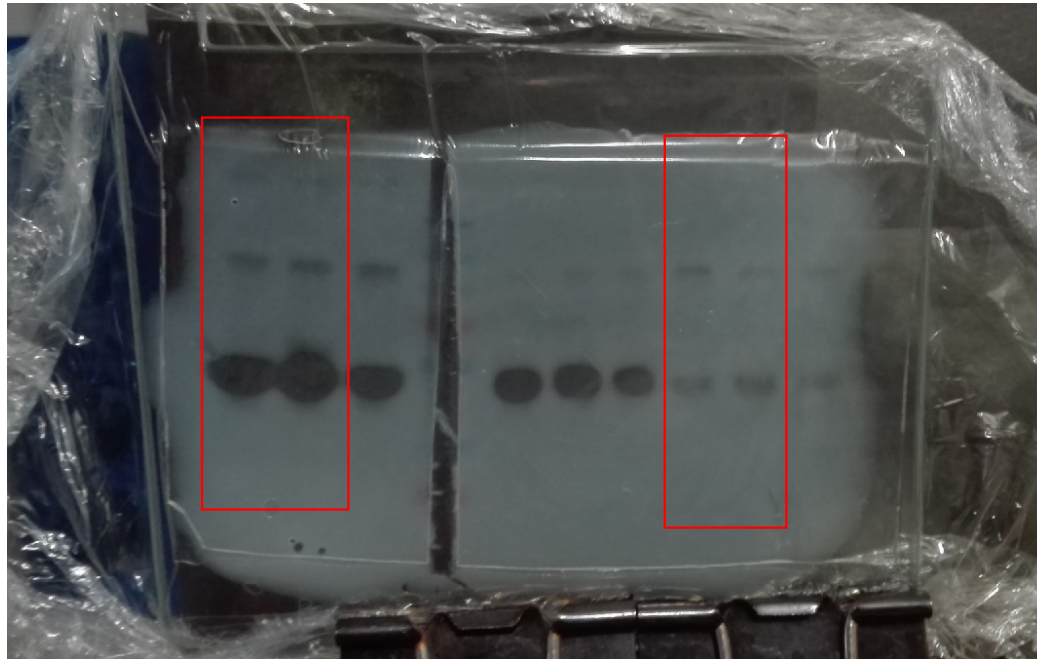

002 2% 002 2% 002 2% 002 2% 002 2% 002 2% Ag 2% Ag 2% Ag 2%  
NT TM10 TM50 NT TM10 TM50 NT TM10 TM50
